# Supplementary material
Source: PubMed Central journal article supplement (PMC4661126)
Supplement: NIHMS730865-supplement-2.pdf [file NIHMS730865-supplement-2.pdf]

|                                          | Resting potential (mV) | AP voltage threshold (mV) | AP half width (ms) | Input resistance (M $\Omega$ ) | AP current threshold (pA) |
|------------------------------------------|------------------------|---------------------------|--------------------|--------------------------------|---------------------------|
| <i>PvalbCre;Ai9</i> (WT)                 | -62.83 $\pm$ 0.93      | -35.61 $\pm$ 1.01         | 0.728 $\pm$ 0.05   | 78.2 $\pm$ 16.82               | 741.66 $\pm$ 202.68       |
| <i>PvalbCre;Ai9;Piezo2<sup>ckO</sup></i> | -61.31 $\pm$ 0.98      | -29.48 $\pm$ 2.88         | 0.922 $\pm$ 0.074  | 182.89 $\pm$ 23.09             | 411.25 $\pm$ 86.68        |

**Supplementary Table 1.** Electrical properties of cultured tdTomato<sup>+</sup> DRG neurons from *PvalbCre;Ai9* (WT) and *PvalbCre;Ai9;Piezo2<sup>ckO</sup>* mice.

**a**

| Measurement                                            | <i>Piezo2<sup>fl/+</sup></i> (WT) | <i>PvalbCre;Piezo2<sup>ckO</sup></i> |
|--------------------------------------------------------|-----------------------------------|--------------------------------------|
| Age (days)                                             | 65 ± 8                            | 62 ± 4                               |
| Body weight (g)                                        | 24.6 ± 1.9                        | 21.8 ± 2.9                           |
| Muscle weight (mg)                                     | 10.2 ± 0.7                        | 10.1 ± 0.5                           |
| Lo (mm)                                                | 11.8 ± 0.7                        | 11.9 ± 0.8                           |
| Muscle cross sectional area (cm <sup>2</sup> )         | 8.2 ± 0.4                         | 8.4 ± 0.8                            |
| Maximal tetanic contractile force (N/cm <sup>2</sup> ) | 17.4 ± 3.5                        | 16.4 ± 4.5                           |

**b**

| Measurement                                            | <i>Piezo2<sup>fl/+</sup></i> (WT) | <i>HoxB8Cre;Piezo2<sup>ckO</sup></i> |
|--------------------------------------------------------|-----------------------------------|--------------------------------------|
| Age (days)                                             | 88 ± 11                           | 80 ± 12                              |
| Body weight (g)                                        | 25.6 ± 1.2                        | 23.1 ± 0.8*                          |
| Muscle weight (mg)                                     | 9.5 ± 1.1                         | 10.7 ± 0.8*                          |
| Lo (mm)                                                | 12.2 ± 0.8                        | 11.3 ± 1.2                           |
| Muscle cross sectional area (cm <sup>2</sup> )         | 7.4 ± 1.2                         | 9.0 ± 1.2*                           |
| Maximal tetanic contractile force (N/cm <sup>2</sup> ) | 18.9 ± 7.8                        | 18.6 ± 6.3                           |

**Supplementary Table 2.** Properties of *PvalbCre;Piezo2<sup>ckO</sup>* and *HoxB8Cre;Piezo2<sup>ckO</sup>* mice used for *ex vivo* muscle-nerve recordings.

a, No values are significantly different between groups with Independent *t*-test.

Mouse numbers = 4 *PvalbCre;Piezo2<sup>ckO</sup>* and 3 WT animals; Muscle numbers = 8 *PvalbCre;Piezo2<sup>ckO</sup>* and 5 WT muscles.

b, \* denotes  $p < 0.05$  from WT from Independent *t*-test.

Mouse numbers = 4 *HoxB8Cre;Piezo2<sup>ckO</sup>* and 5 WT animals; Muscle numbers = 8 *HoxB8Cre;Piezo2<sup>ckO</sup>* and 10 WT muscles.
